# Supplementary material
Source: publisher figshare collection journal article supplement (https://future-science-group.figshare.com/ndownloader/files/28972443)
Supplement: Supplementary file 1 [file 28972443]

| Primer | Sequence (5’-3’) | Gene | Amplicon (bp) | Reference | |
| --- | --- | --- | --- | --- | --- |
| VP1F | GGCTATTAAAGCTGTACAATGGG | VVP1 | 686 | | Varghese et al., 2006 [21] | |
| VP1R | TAATCCTCATGAGAAAACACTGAC |
| VP2F | GGCTATTAAAGGCTCAATGGGCG | VVP2 | 686 | Varghese et al., 2006 [21] | |
| VP2R | CTTCATCTTGAAATATAGCAATCAC |
| VP3F | GGCTATTAAAGCAGTACCAGTAG | VVP3 | 702 | Varghese et al., 2006 [21] | |
| VP3R | GTAAACATAGATTCATTACCGCGGACC |
| 4con3(+) | TGGCTTCGCCATTTATAGACA | VVP4 | 876 | Gentsch et al.,1992 [19] | |
| 4con2(-) | ATT TCG GAC CAT TAT AAC C |
| VP6F | GGCTTTTAAACGAAGTCTTC | VVP6 | 1356 | Matthijnssens et al., 2006 [20] | |
| VP6R | GGTCACATCCTCTCACTACA |
| Beg9 | GGCTTTAAAAGAGAGAATTTCCGTCTGG | VVP7 | 1062 | Gouvea et al.,1990 [18] | |
| End9 | GGTCACATCATACAATTCTAATCTAAG |
| NSP1F | GGGCTTTTTTTTGAAAAGTC | NNSP1 | 1590 | Matthijnssens et al., 2006 [20] | |
| NSP1R | GGGTTCACAGTATTTTGC |
| NSP2F | GGCTTTTAAAGCGTCTCAG | NNSP2 | 1059 | Matthijnssens et al., 2006 [20] | |
| NSP2R | GGTCACATAAGCGCTTTC |
| NSP3F | GGCTTTTAATGCTTTTCAGTG | NNSP3 | 1078 | Matthijnssens et al., 2006 [20] | |
| NSP3R | ACATAACGCCCCTATAGC |
| JRG30F | GGCTTTTAA AAG TTC TGT T | NNSP4 | 738 | Cunliffe et al., 1997 [22] | |
| JRG31R | ACCATTCCT TCC ATTAAC |
| NSP5F | GGCTTTTAAAGCGCTACAG | NNSP5 | 667 | Matthijnssens et al., 2006 [20] | |
| NSP5R | GGTCACAAAACGGGAGT |
